# Supplementary material
Source: PubMed Central journal article supplement (PMC3276848)
Supplement: NIHMS37925-supplement-2.pdf [file NIHMS37925-supplement-2.pdf]

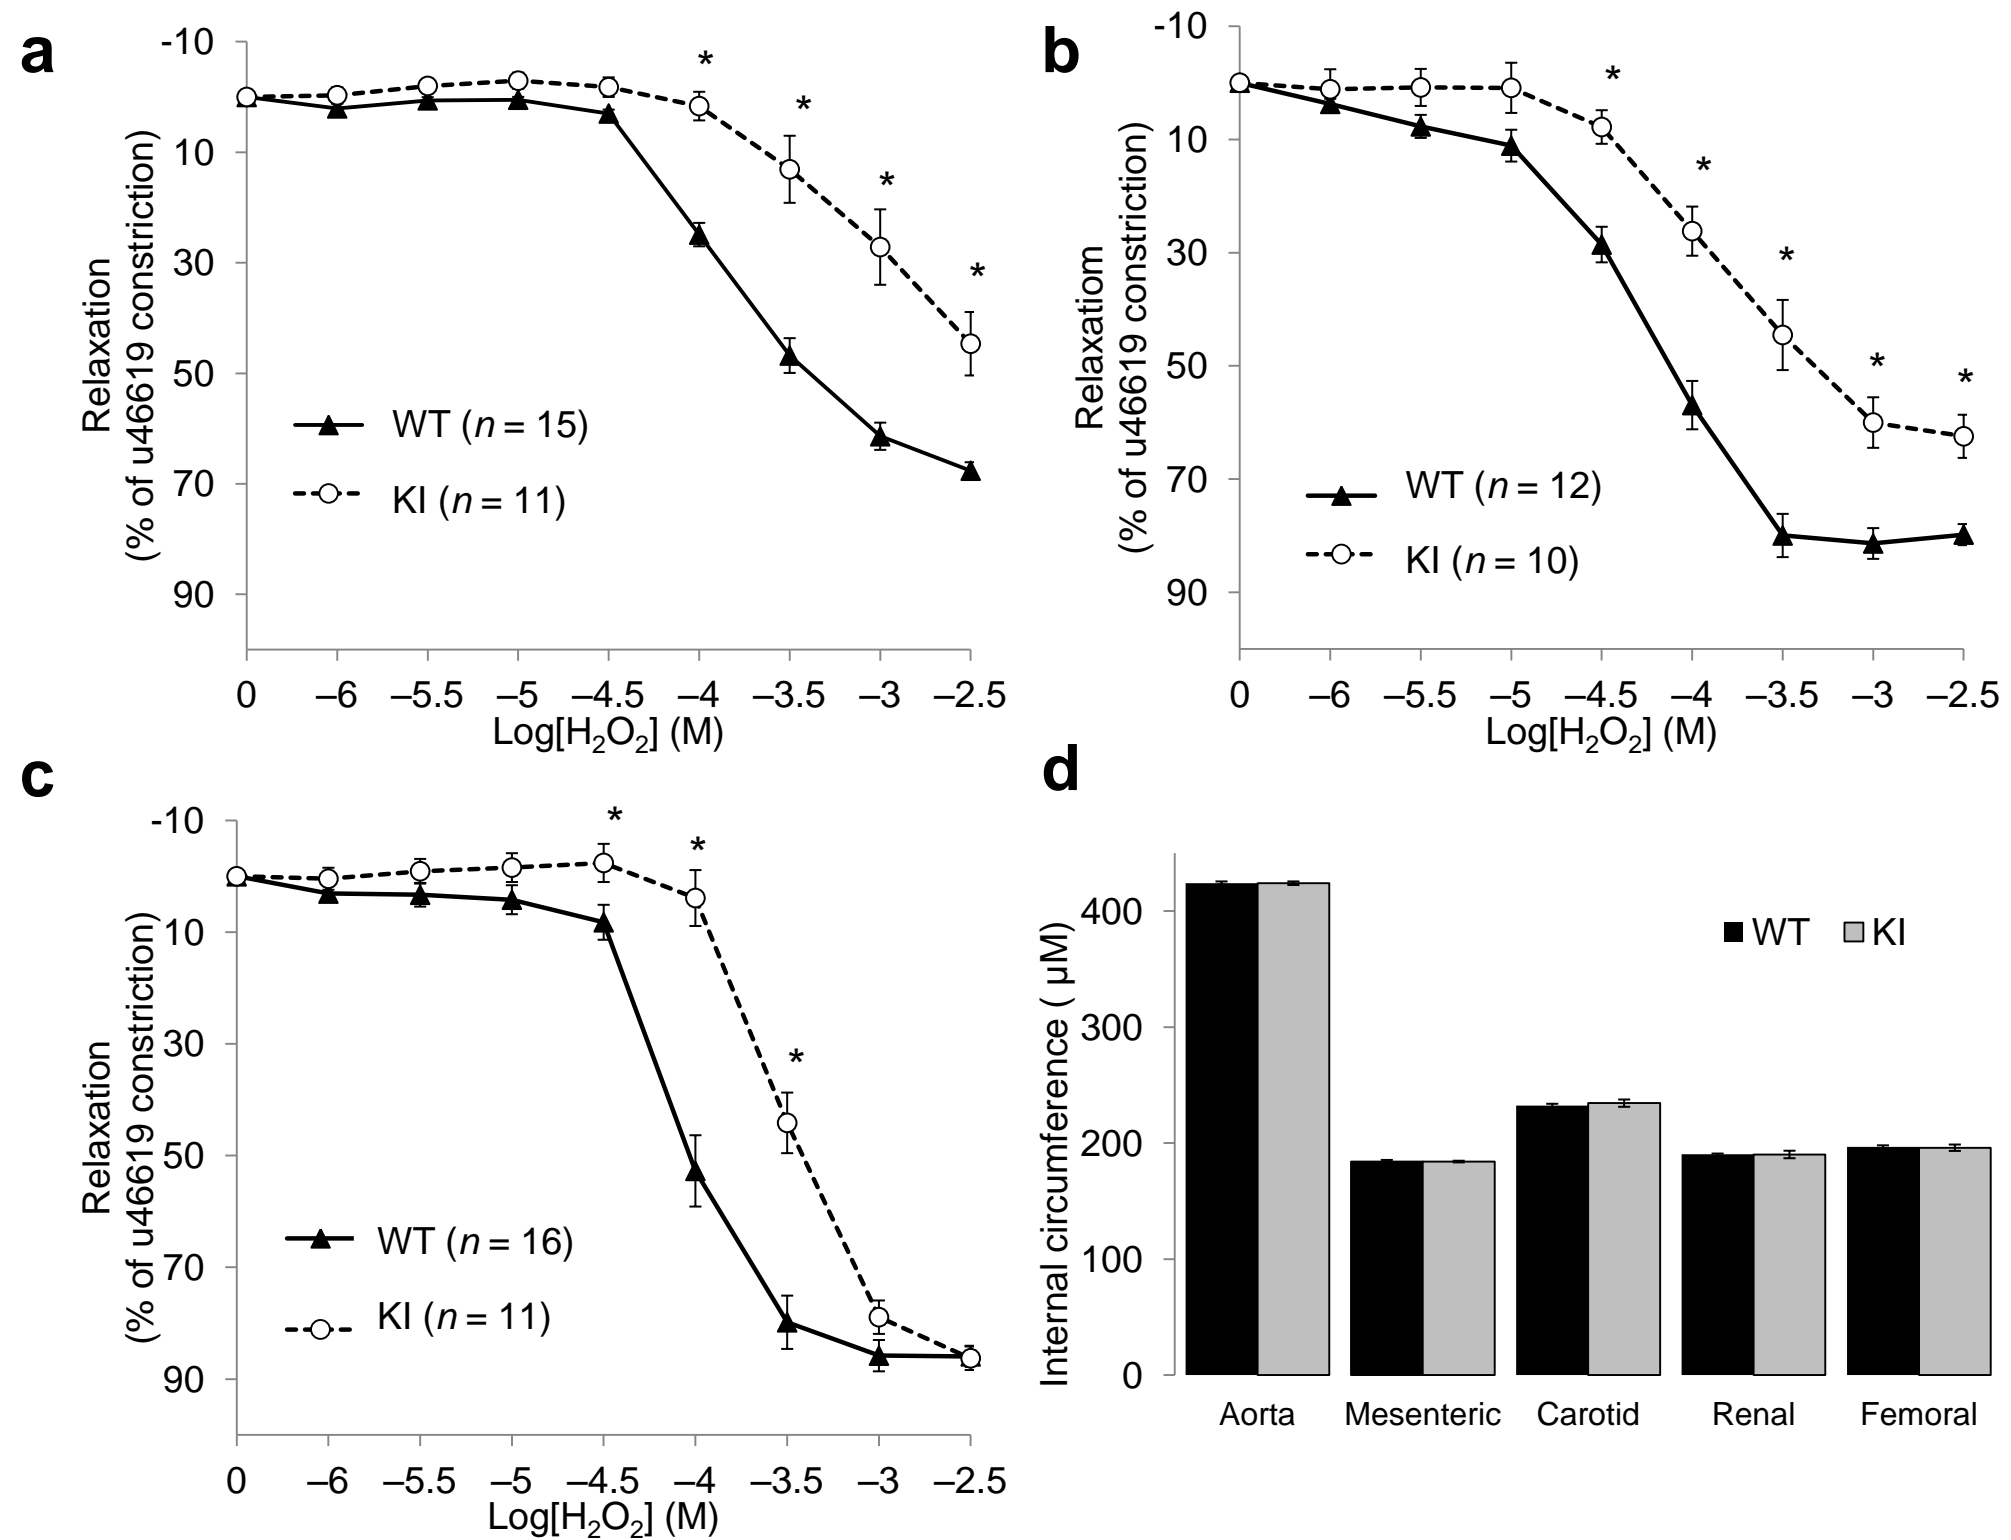

**Supplementary Figure 1.** Comparison of the dose-dependent relaxation of various WT and KI vessels to H<sub>2</sub>O<sub>2</sub>. **(a-c)** KI carotid arteries were significantly less sensitive to H<sub>2</sub>O<sub>2</sub> than WT ( $EC_{50}$  WT =  $219.4 \pm 21.8$   $\mu$ M,  $EC_{50}$  KI =  $2499.4 \pm 681.0$   $\mu$ M), as were KI renal arteries ( $EC_{50}$  WT =  $69.1 \pm 16.0$   $\mu$ M,  $EC_{50}$  KI =  $298.9 \pm 71.2$   $\mu$ M) and KI femoral arteries ( $EC_{50}$  WT =  $115.3 \pm 29.7$   $\mu$ M,  $EC_{50}$  KI =  $505.1 \pm 88.9$   $\mu$ M). **(d)** The size of the vessels compared was not different between genotypes.
