# Supplementary material
Source: PubMed Central journal article supplement (PMC3276848)
Supplement: NIHMS37925-supplement-3.pdf [file NIHMS37925-supplement-3.pdf]

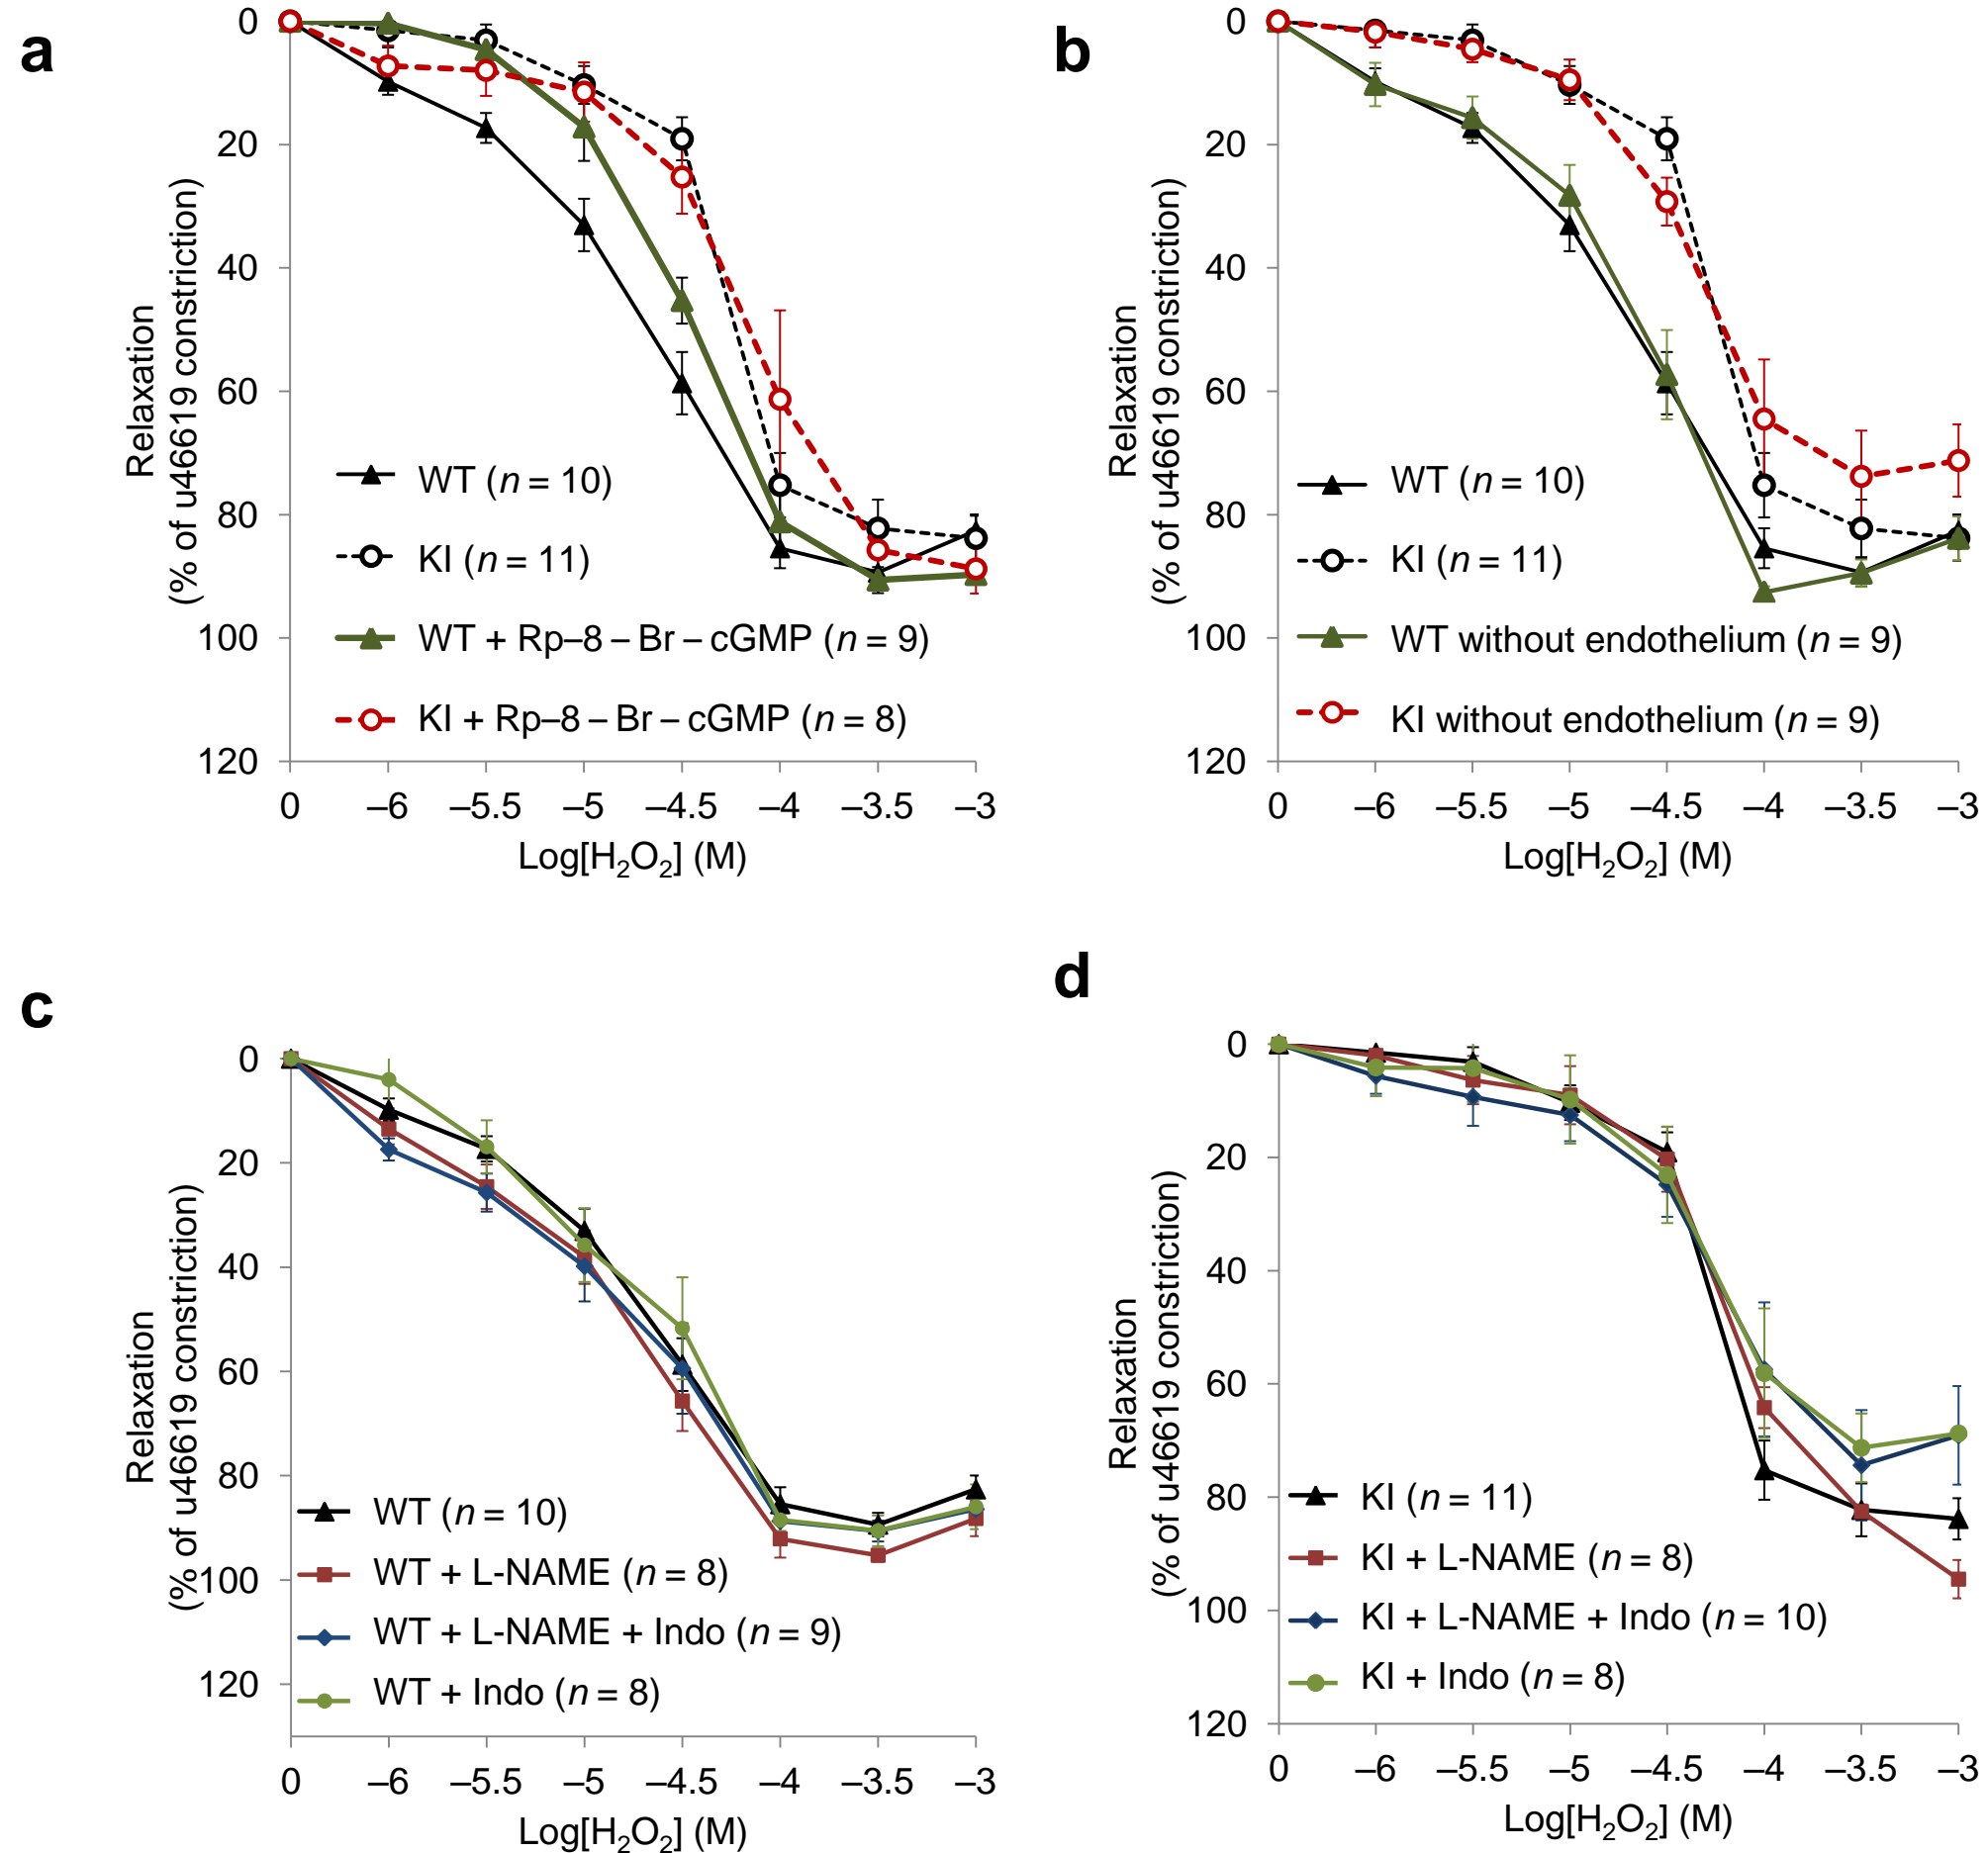

**Supplementary Figure 2.** Dose-dependent relaxation of WT and KI mesenteries to H<sub>2</sub>O<sub>2</sub>. **(a)** The WTs were more sensitive in their relaxation to H<sub>2</sub>O<sub>2</sub> compared to KIs. The PKG inhibitor Rp-8-Br-cGMP attenuated the H<sub>2</sub>O<sub>2</sub>-induced relaxation in WT, but not KI, mesenteries. **(b)** The H<sub>2</sub>O<sub>2</sub>-induced relaxation of WT or KI mesenteries was not altered by the removal of the endothelium. **(c-d)** L-NAME, indomethacin or both inhibitors in combination did not alter the relaxation of WT or KI mesenteries to H<sub>2</sub>O<sub>2</sub>.
