# Supplementary material
Source: PubMed Central journal article supplement (PMC3276848)
Supplement: NIHMS37925-supplement-4.pdf [file NIHMS37925-supplement-4.pdf]

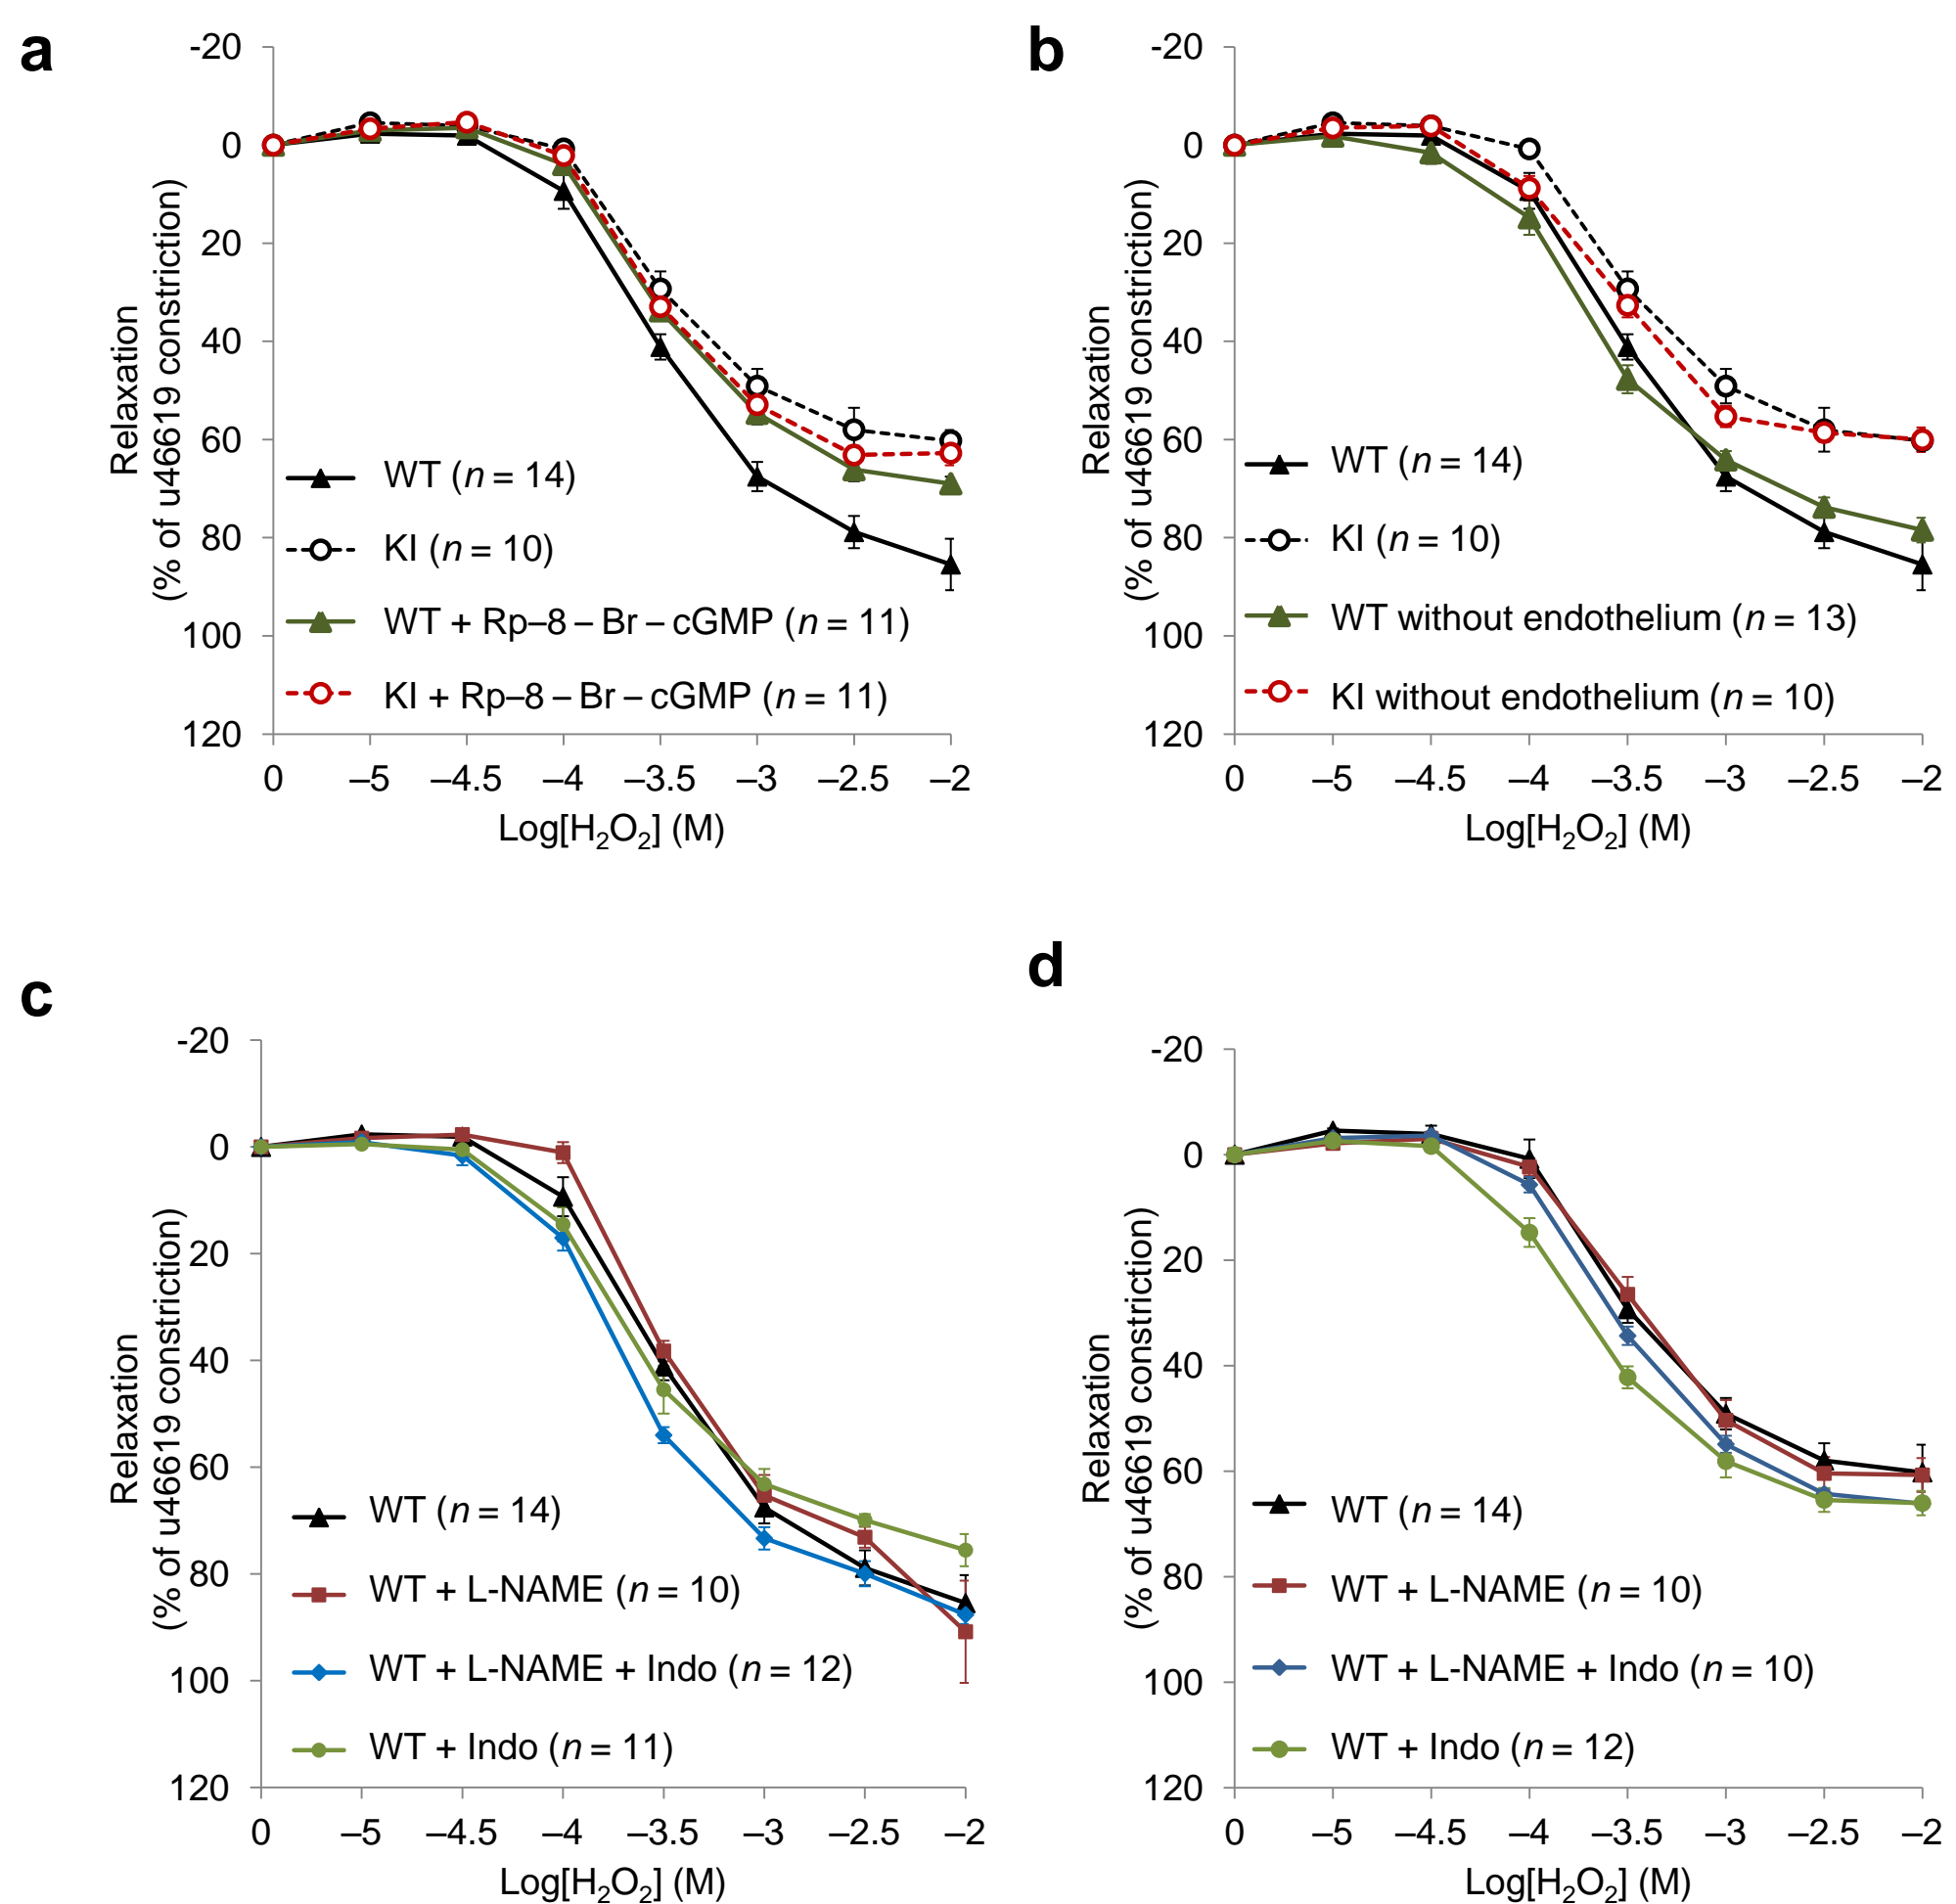

**Supplementary Figure 3.** Dose-dependent relaxation of WT and KI aorta to H<sub>2</sub>O<sub>2</sub>. **(a)** KI aorta had a sub-maximal (45.4%) relaxation compared to WT at higher doses of H<sub>2</sub>O<sub>2</sub>. This enhanced relaxation of WT to doses of H<sub>2</sub>O<sub>2</sub> was attenuated by the PKG inhibitor Rp-8-Br-cGMP. Rp-8-Br-cGMP did not alter the response of KI aorta to H<sub>2</sub>O<sub>2</sub>. **(b-d)** The H<sub>2</sub>O<sub>2</sub>-induced relaxation of WT or KI aorta was not altered by the removal of the endothelium or the presence of L-NAME, indomethacin or both inhibitors in combined.
