# Supplementary material
Source: PubMed Central journal article supplement (PMC3276848)
Supplement: NIHMS37925-supplement-5.pdf [file NIHMS37925-supplement-5.pdf]

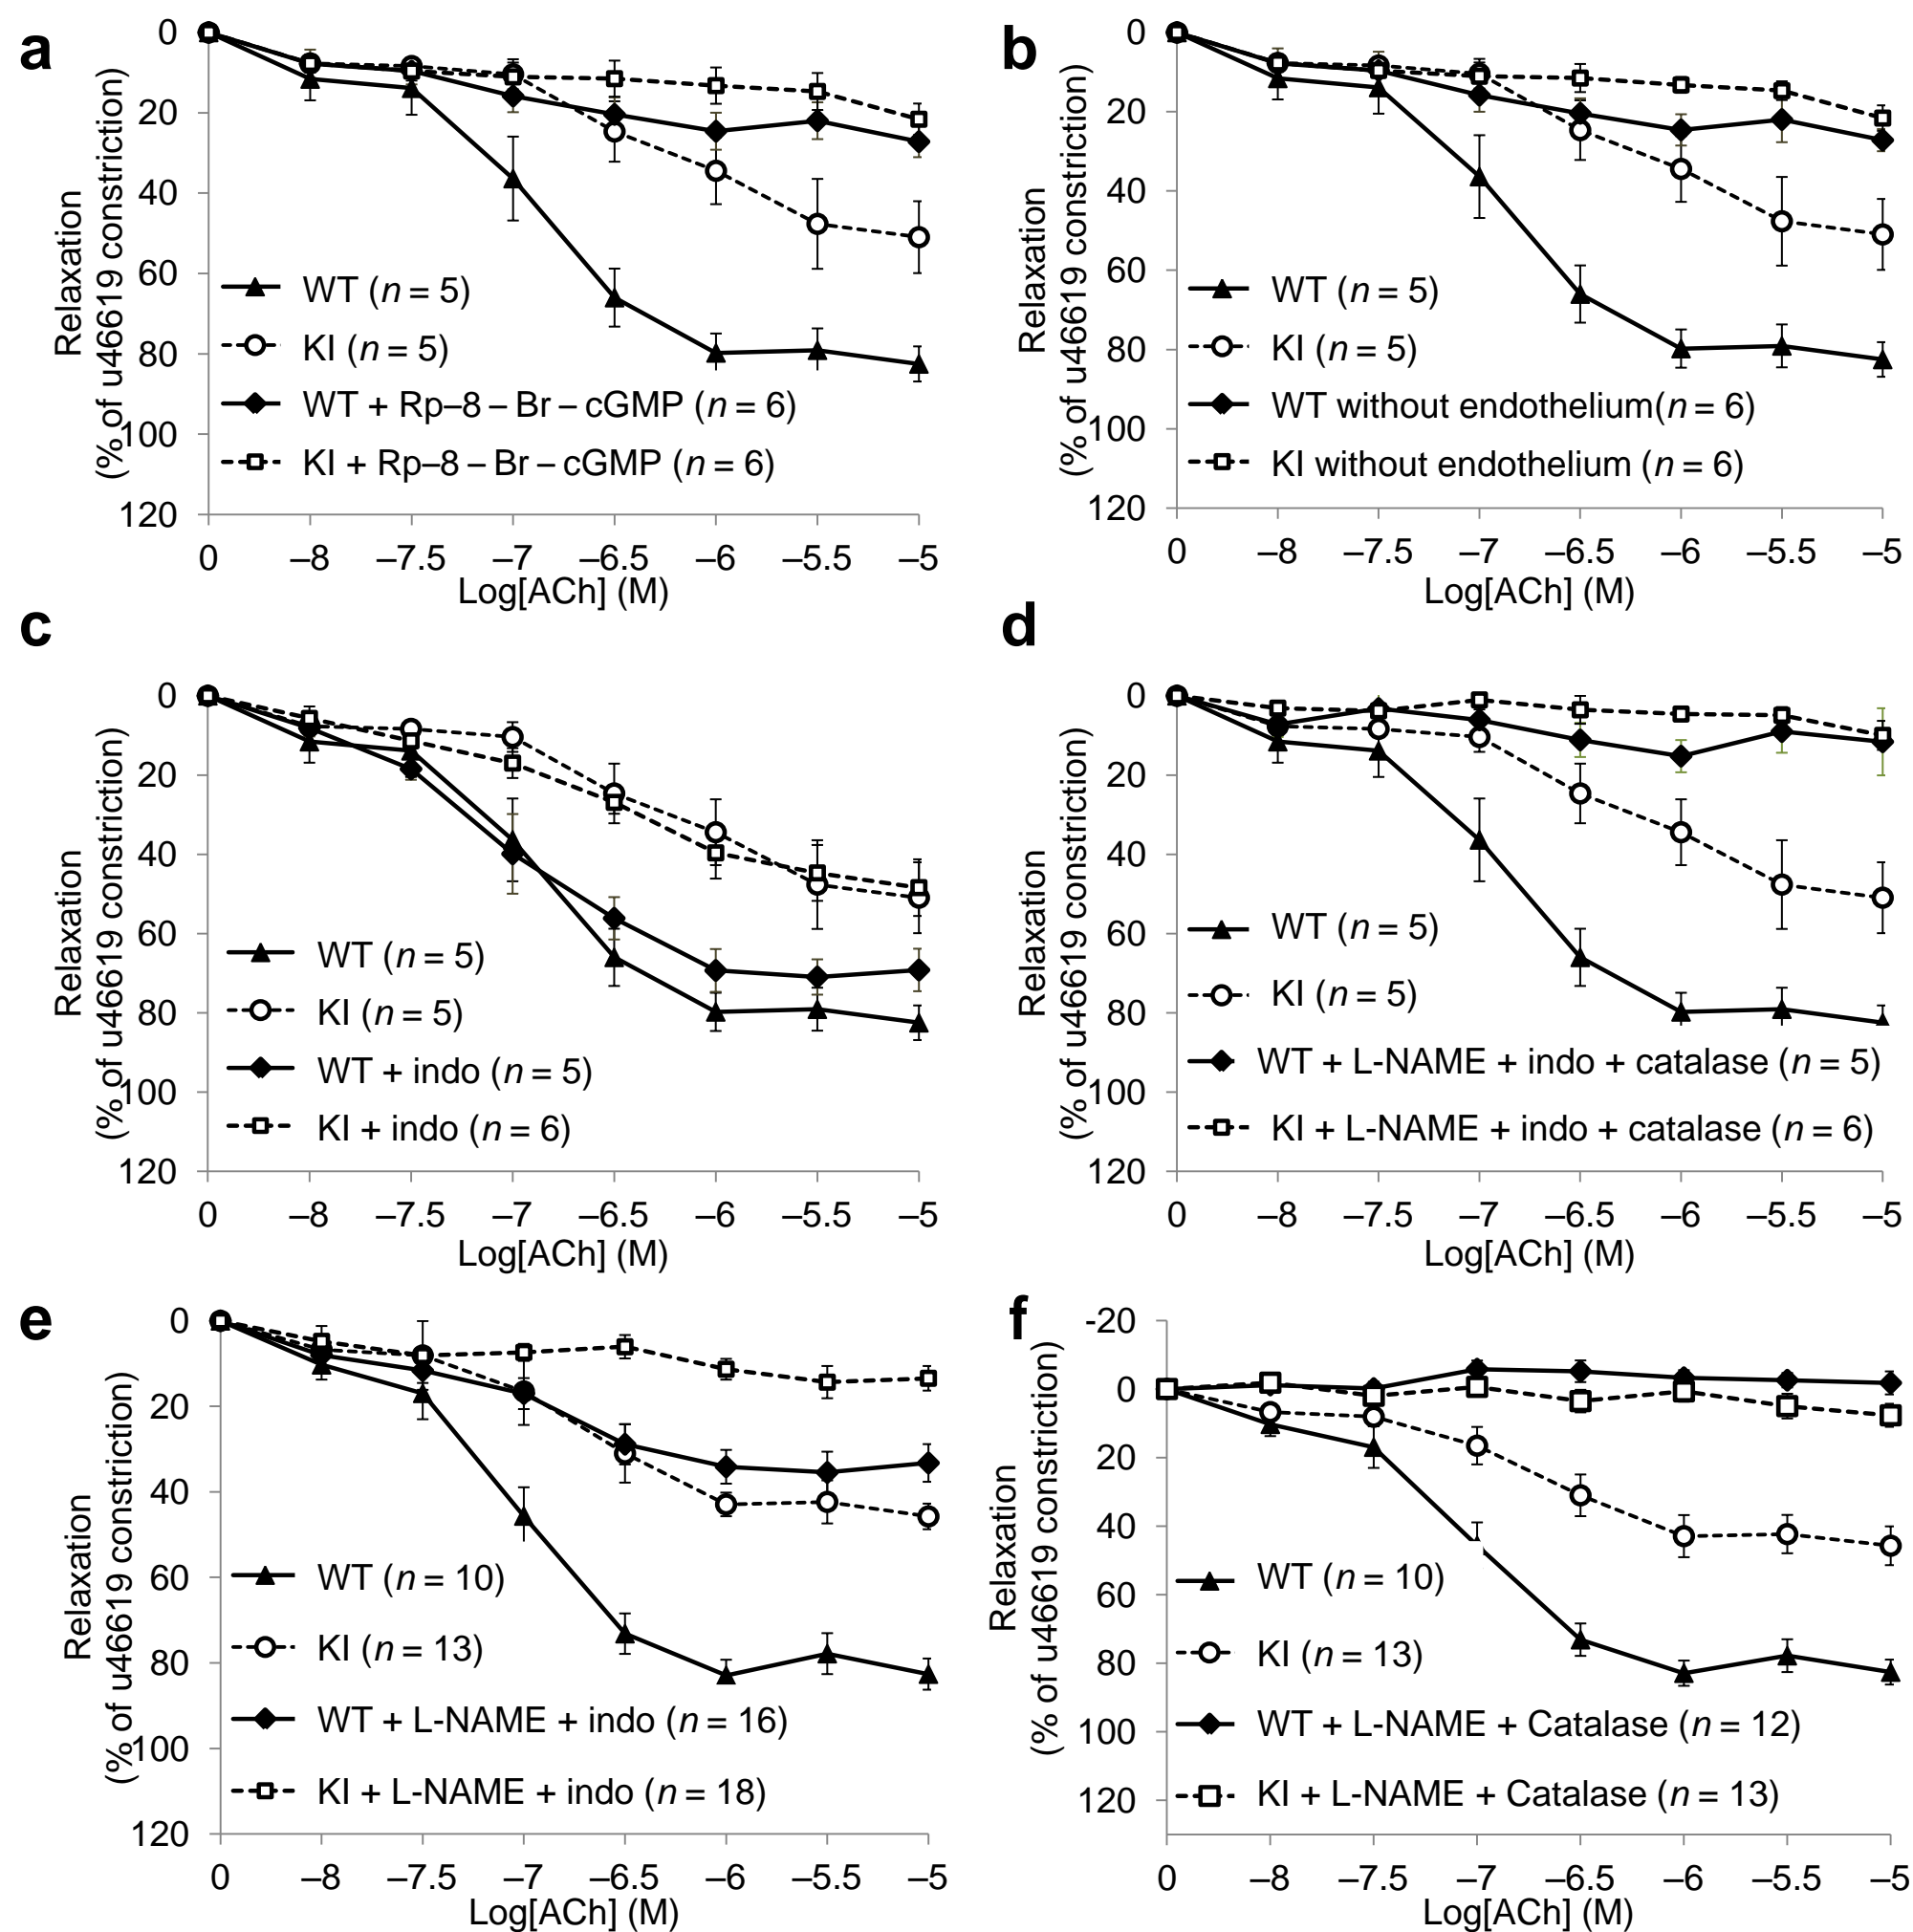

**Supplementary Figure 4.** Characterisation of the responses of WT and KI mesenteries to acetylcholine. (a) KI vessel relaxations are markedly less sensitive to acetylcholine compared to WT mesenteries ( $EC_{50}$  WT=  $148.9 \pm 48.9$   $\mu$ M,  $EC_{50}$  KI =  $614.2 \pm 162.9$   $\mu$ M). The acetylcholine-induced relaxation in WT was efficiently attenuated by the PKG inhibitor Rp-8-Br-cGMP, but had little effect on the KI vessel. (b) Removal of the endothelium from WT mesenteries greatly impaired their acetylcholine-induced relaxation, but did not alter (the already impaired) relaxation profile of KI. (c) Indomethacin did not alter the relaxation profiles induced by acetylcholine in WT or KI mice. (d) L-NAME and indomethacin in combination attenuated the relaxation induced by acetylcholine. (e) L-NAME, indomethacin and catalase in combination were highly effective in attenuating the relaxation induced by acetylcholine. (f) When the L-NAME was supplemented solely with catalase, acetylcholine-dependent relaxation was also fully blocked.
