# Supplementary material
Source: PubMed Central journal article supplement (PMC3276848)
Supplement: NIHMS37925-supplement-6.pdf [file NIHMS37925-supplement-6.pdf]

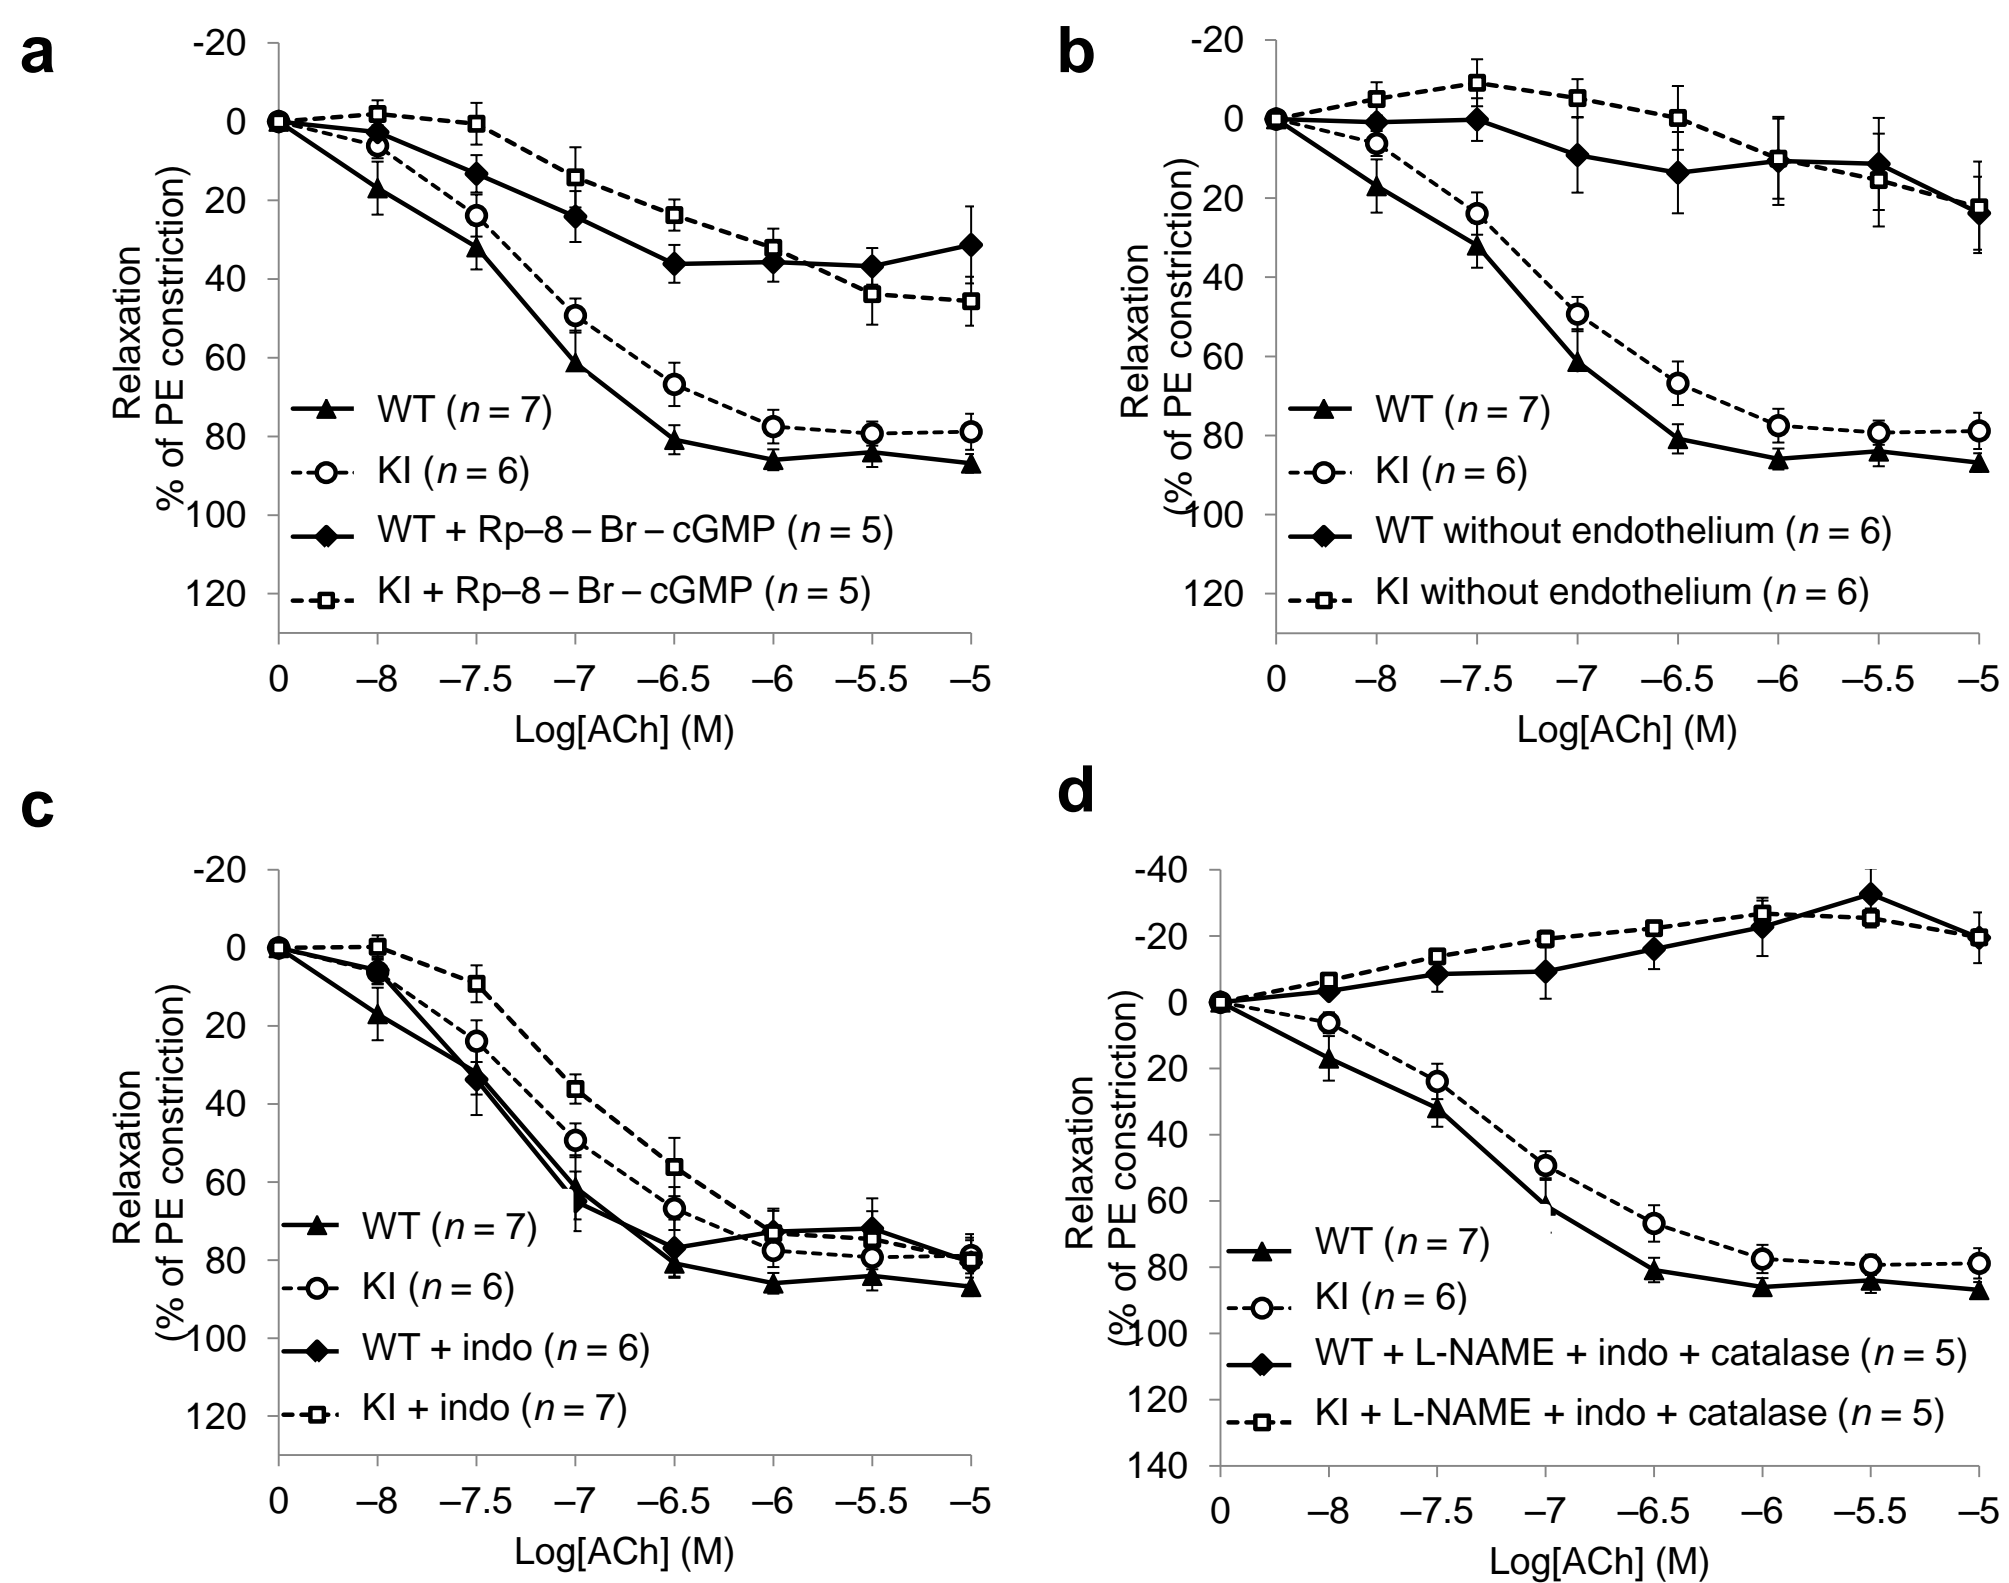

**Supplementary Figure 5.** Characterisation of the responses of WT and KI aortas to acetylcholine. **(a)** There was no difference in the relaxation profiles of WT or KI aorta to acetylcholine; however both were efficiently blocked by Rp-8-Br-cGMP. **(b)** Removal of the endothelium from WT or KI aorta also efficiently blocked acetylcholine-induced relaxation. **(c)** Indomethacin also did not alter the acetylcholine-induced relaxation responses of WT or KI aorta. **(d)** L-NAME, indomethacin and catalase in combination were highly effective in attenuating the relaxation induced in WT and KI aorta by acetylcholine. **(e-f)** There was no difference between the SpNONOate- or 8-Br-cGMP-induced relaxation of WT or KI aorta.
