# Supplementary material
Source: PubMed Central journal article supplement (PMC3276848)
Supplement: NIHMS37925-supplement-7.pdf [file NIHMS37925-supplement-7.pdf]

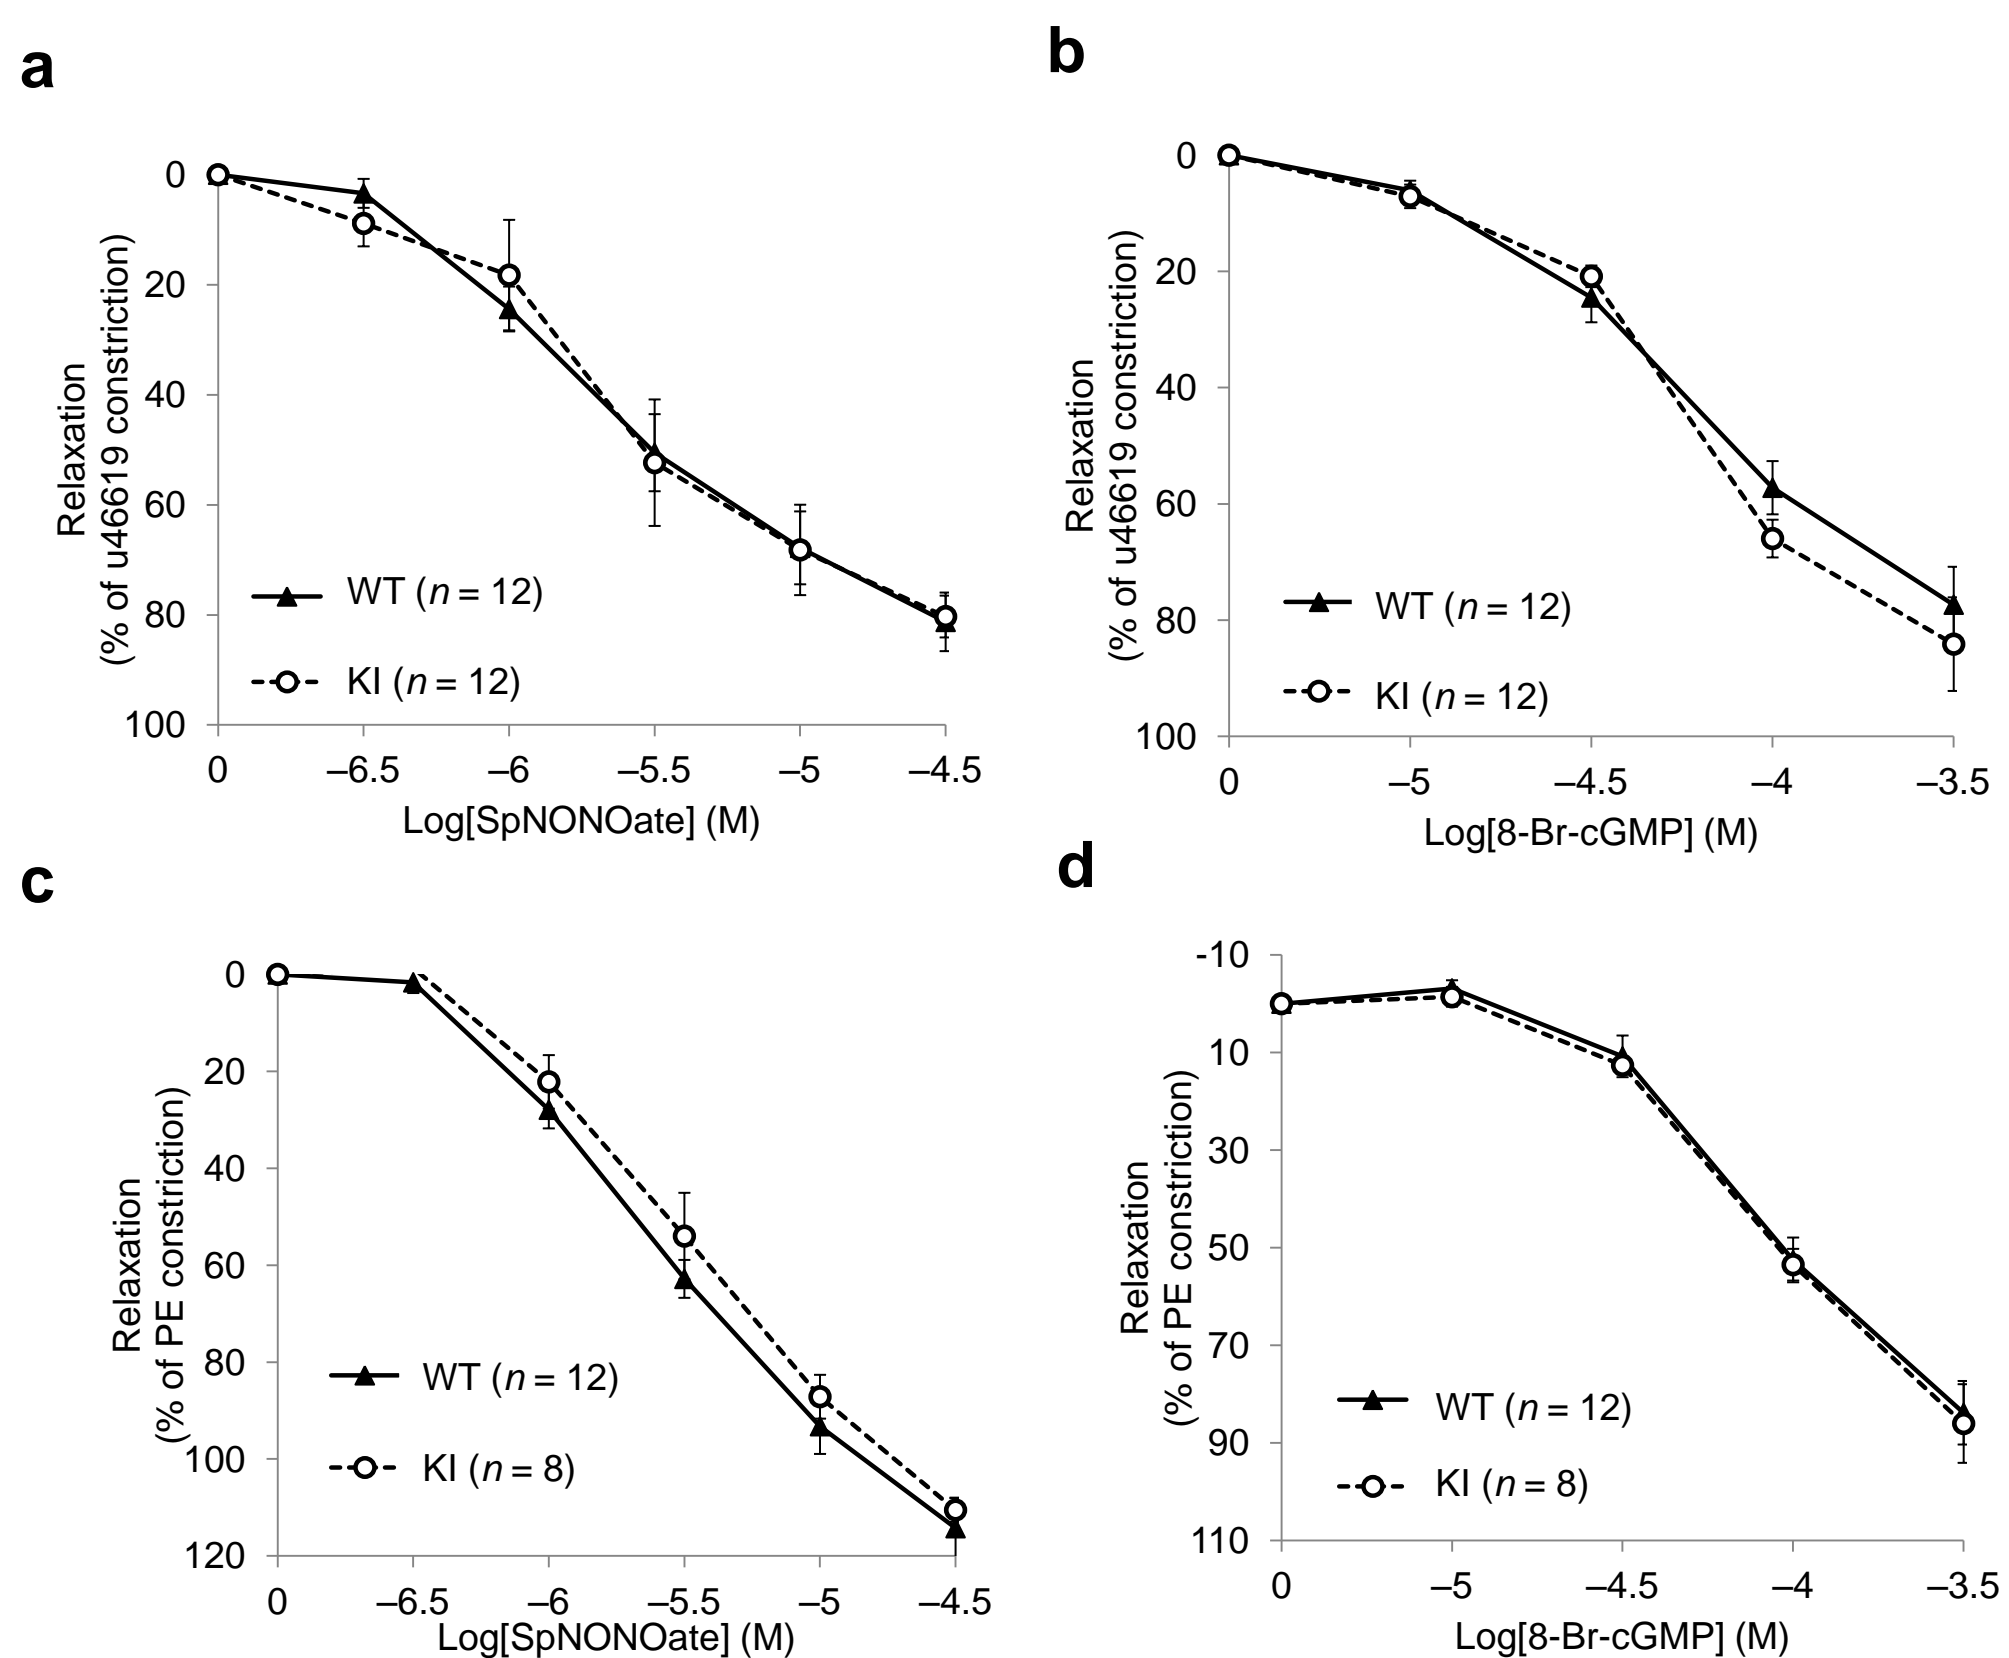

**Supplementary Figure 6.** Comparison of the responses of WT and KI vessels to a NO donor or direct activator of PKG (**a-b**) There was no difference between the SpNONOate- or 8-Br-cGMP-induced relaxation of WT or KI mesenteries. (**c-d**) There was no difference between the SpNONOate- or 8-Br-cGMP-induced relaxation of WT or KI aorta.
