# Supplementary material
Source: PubMed Central journal article supplement (PMC3276848)
Supplement: NIHMS37925-supplement-8.pdf [file NIHMS37925-supplement-8.pdf]

**a**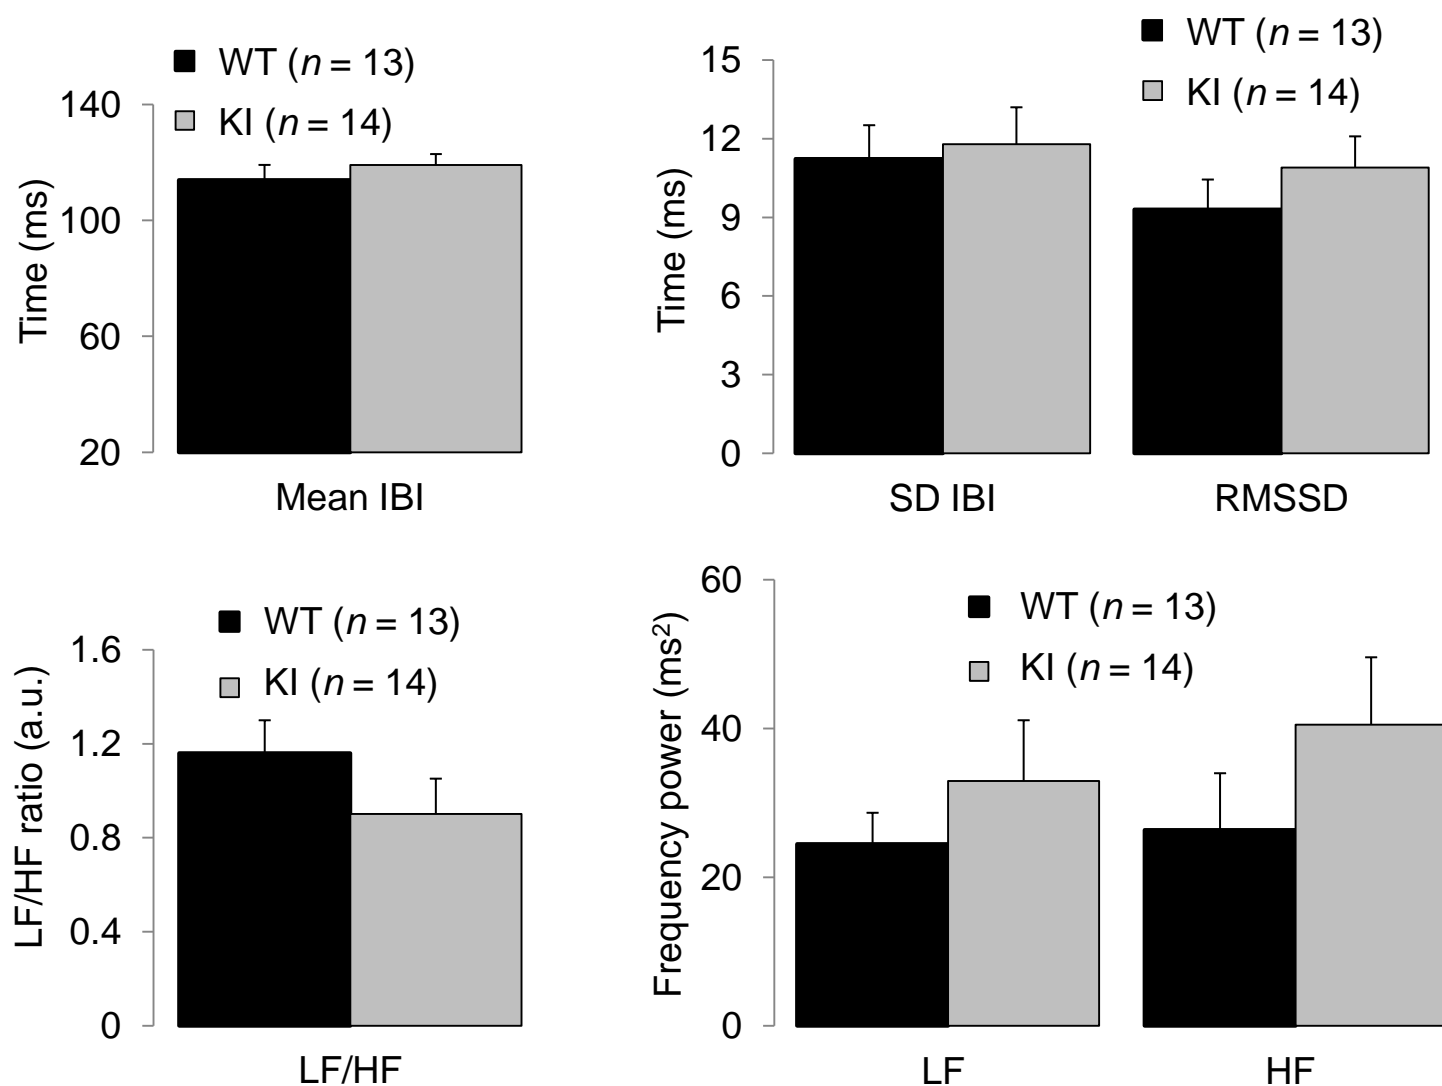**b**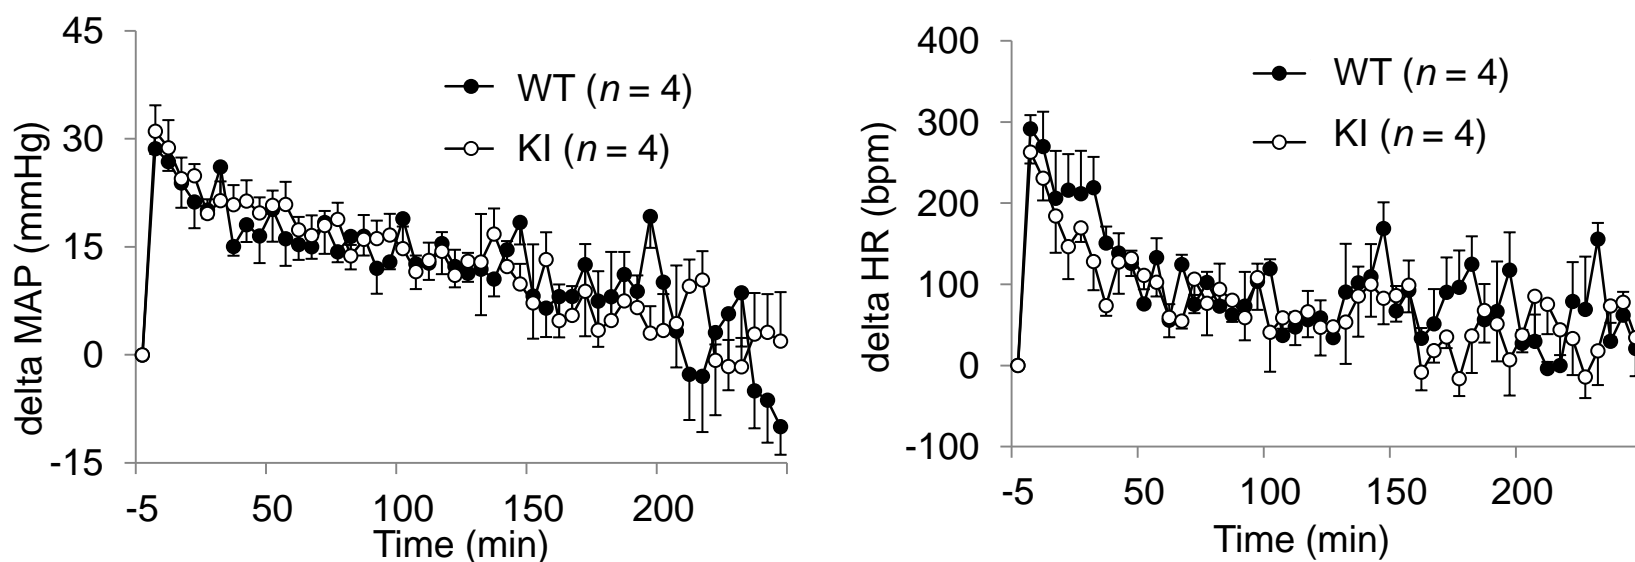

**Supplementary Figure 7.** Comparison of the new environment stress responses and heart rate variability of WT and KI mice. (a) Heart rate variability analysis in WT and KI mice revealed no differences in time domain parameters (IBI, inter-beat interval; SD IBI, standard deviation of inter-beat interval; RMSSD, root mean square of successive differences) or frequency domain parameters (LF, low frequency power in range 0.4-1.5Hz; HF, high frequency power in range 1.5-4Hz; LF/HF, low frequency-to-high frequency ratio) suggesting that autonomic regulation of the blood pressure was similar in both genotypes. (b) A new environment challenge elevated mean arterial pressure and the heart rate to the same level in both genotypes demonstrating that sympathetic activation was not altered in KI in response to stress.
